# Supplementary figures and images for: Unveiling Apple Diversity: The Quality of Juice Produced from Old vs. Commercial Apple Cultivars
Source: MDPI journal article supplement (doi:10.3390/plants12213733), 2023-10-31

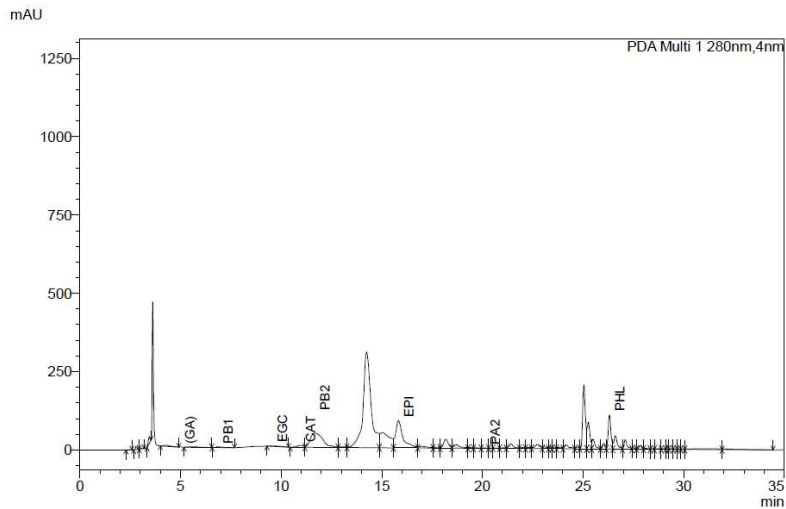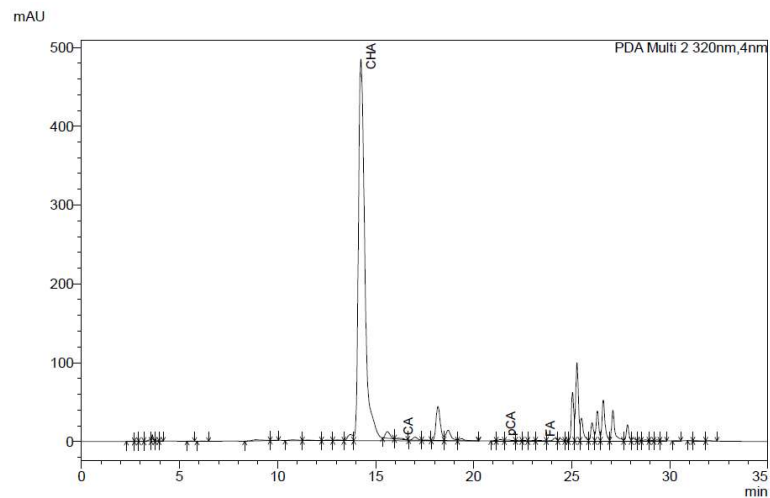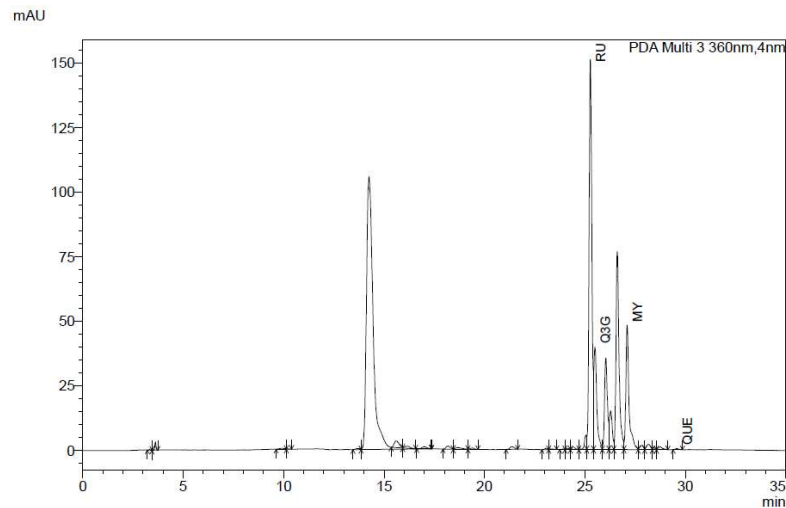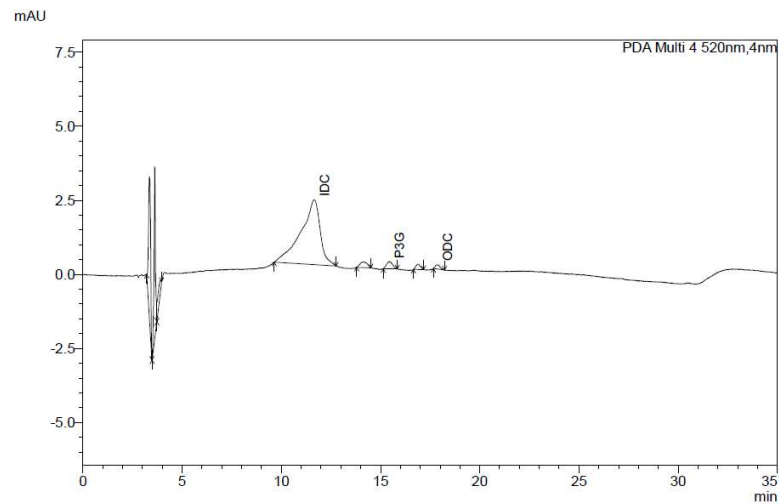

Supplement: s1 [file s1]
